# Supplementary material
Source: HighWire-hosted journal article supplement (http://dmd.aspetjournals.org/highwire/filestream/66145/field_highwire_adjunct_files/0/Correction_dmd.110.037838.pdf)

## Correction to “A Semiphysiological Population Model for Prediction of the Pharmacokinetics of Drugs under Liver and Renal Disease Conditions”

In the above article [Strougo A, Yassen A, Krauwinkel W, Danhof M, and Freijer F (2011) *Drug Metab Dispos* **39**:1278-1287], panels A, B, and C in Fig. 6 were duplicated as panels D, E, and F. The correct figure is given below.

The authors regret this error and apologize for any confusion or inconvenience it may have caused.

Figure 6

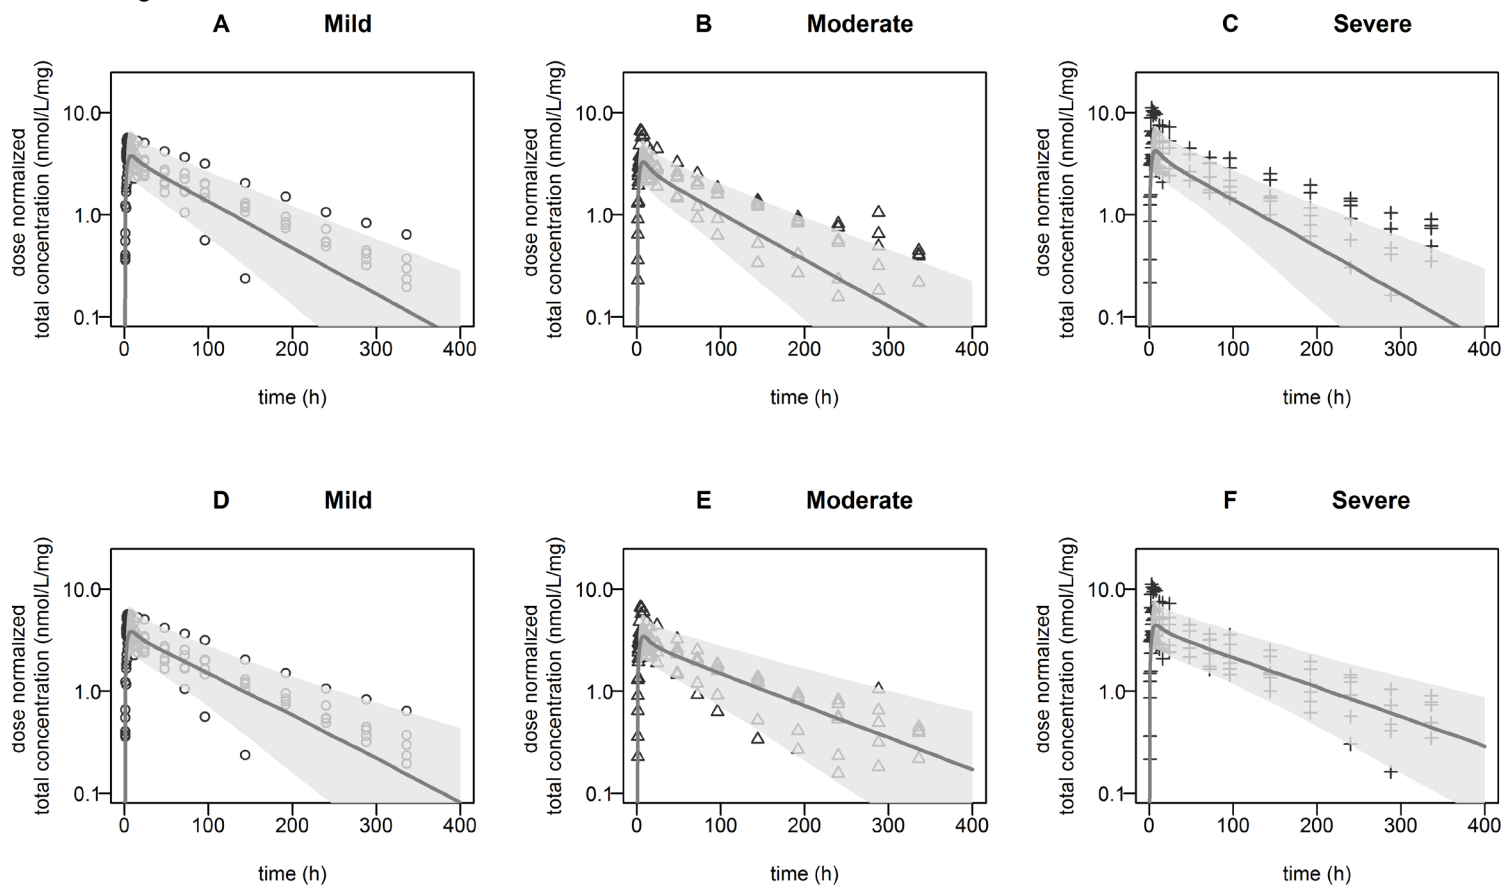

Supplement: Correction_dmd.110.037838.pdf [file Correction_dmd.110.037838.pdf]
